# Supplementary material
Source: PubMed Central journal article supplement (PMC1177420)

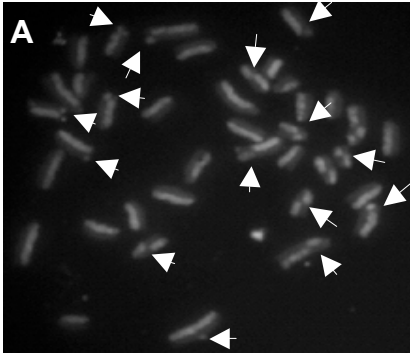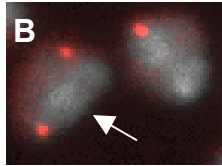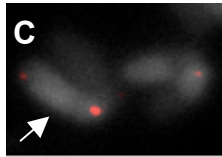

Supplement: pnas_0504635102_2.pdf [file pnas_0504635102_2.pdf]

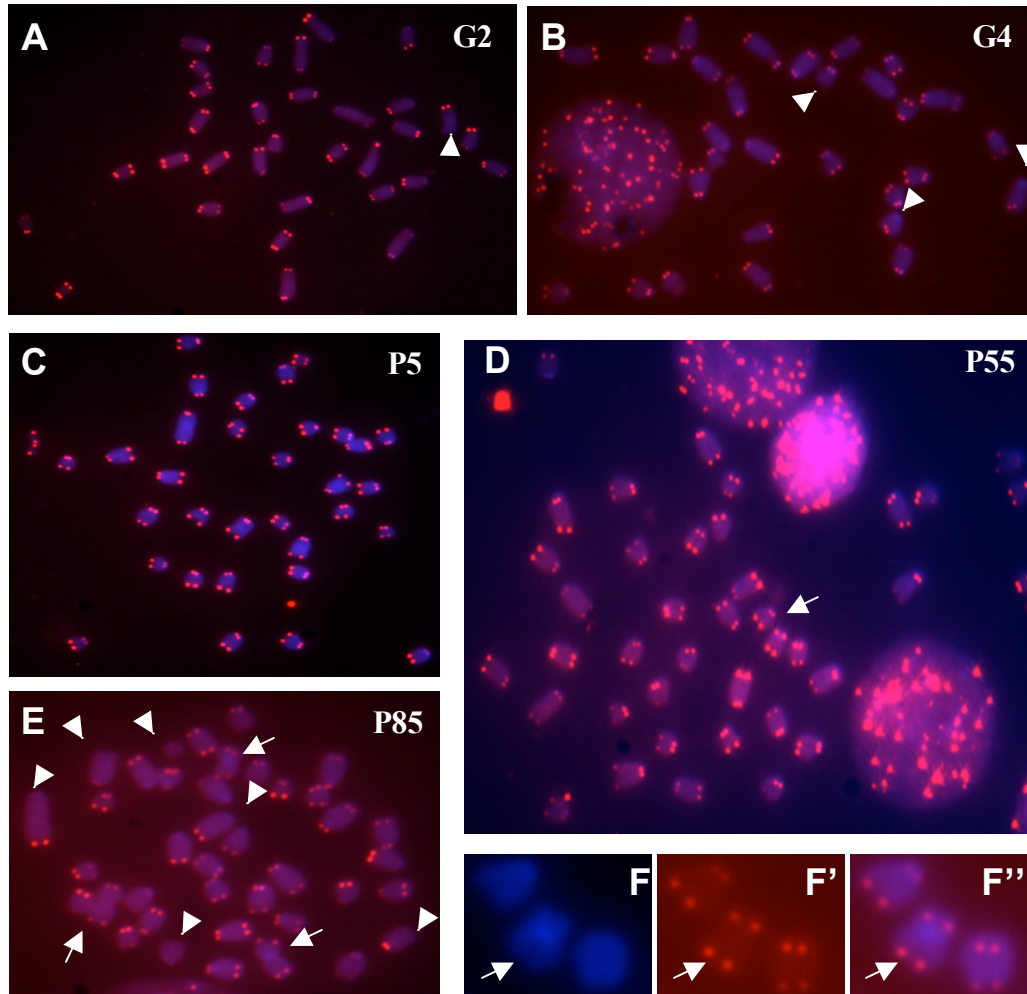

Supplement: pnas_0504635102_3.pdf [file pnas_0504635102_3.pdf]
